# Supplementary material for: Sensitivity of CO oxidation toward metal oxidation state in ceria-supported catalysts: an operando DRIFTS-MS study
Source: Royal Society of Chemistry journal article supplement (doi:10.1039/c5cy00827a), 2015-09-10
Supplement: c5cy00827a1.pdf [file c5cy00827a1.pdf]

## Supporting Information

This SI contains DRIFTS spectra of the employed catalysts after dosing at CO/O<sub>2</sub> mixture at 50 °C.

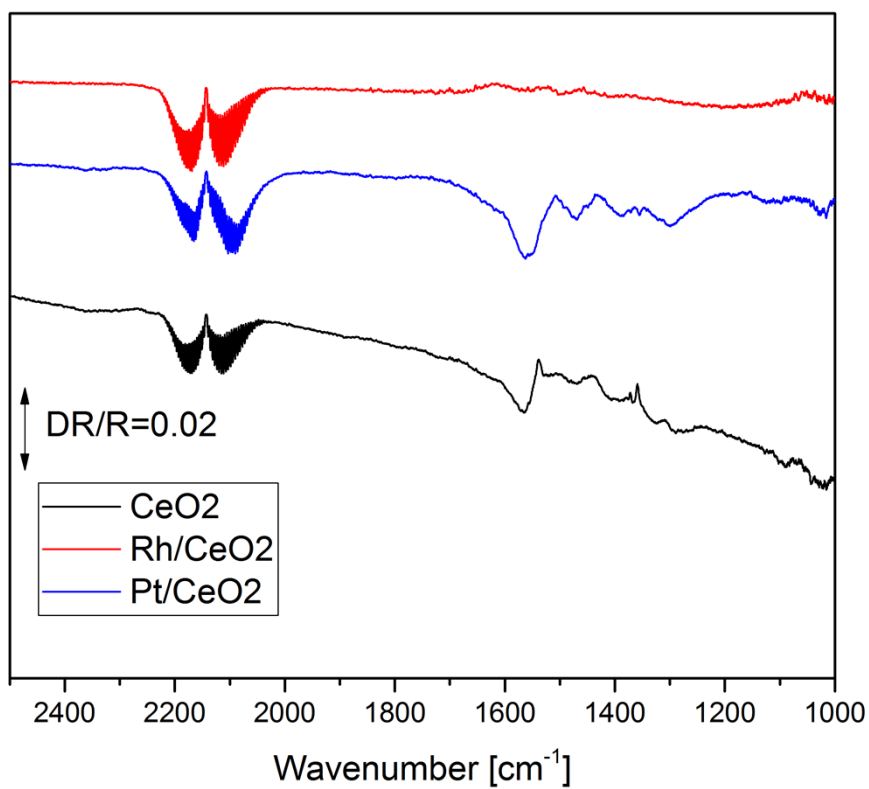

Figure 1: DRIFTS spectra of CeO<sub>2</sub>, Rh/CeO<sub>2</sub> and Pt/CeO<sub>2</sub> after dosing a CO/O<sub>2</sub> mixture at 50 °C
